# Supplementary material for: Cell differentiation is disrupted by MYO5B loss through Wnt/Notch imbalance
Source: JCI journal article supplement (doi:10.1172/jci.insight.150416), 2021-07-01
Supplement: sd1 [file 1]

Supplemental Table 1. Primer sequences for qPCR

| Gene          | Forward                  | Reverse                   |     |
|---------------|--------------------------|---------------------------|-----|
| <i>Wnt3</i>   | GGGGCGTATTCAAGTAGCTG     | GTAGGGACCTCCCATTGGAT      | (1) |
| <i>Wnt6</i>   | TGCCCCGAGGCGCAAGACTG     | ATTGCAAACACGAAAGCTGTCTCTC | (2) |
| <i>Wnt9b</i>  | AAGTACAGCACCAAGTTCCTCAGC | GAACAGCACAGGAGCCTGACAC    | (2) |
| <i>Dll1</i>   | CTGAGGTGTAAGATGGAAGCG    | CAACTGTCCATAGTGCAATGG     | (3) |
| <i>Dll4</i>   | TCGTCGTCAGGGACAAGAATAGC  | CTCGTCTGTTCCGCCAAATCTTACC | (3) |
| <i>Notch2</i> | TGCCTGTTTGACAACCTTTGAGT  | GTGGTCTGCACAGTATTTGTCAT   | (4) |
| <i>Hes1</i>   | TGCCAGCTGATATAATGGAGAA   | CCATGATAGGCTTTGATGACTTT   | (4) |
| <i>Gapdh</i>  | TTCCAGTATGACTCCACTCACGG  | TGAAGACACCAGTAGACTCCACGAC | (5) |

#### References

1. He W, et al. Wnt/beta-catenin signaling promotes renal interstitial fibrosis. *J Am Soc Nephrol.* 2009;20(4):765-76.
2. Davies PS, et al. Wnt-reporter expression pattern in the mouse intestine during homeostasis. *BMC Gastroenterology.* 2008;8(1):57.
3. Bohin N, et al. Rapid Crypt Cell Remodeling Regenerates the Intestinal Stem Cell Niche after Notch Inhibition. *Stem Cell Reports.* 2020;15(1):156-70.
4. Lim JS, et al. Intratumoural heterogeneity generated by Notch signalling promotes small-cell lung cancer. *Nature.* 2017;545(7654):360-4.
5. Ulatowski LM, et al. Strain-specific variants of the mouse *Cftr* promoter region reveal transcriptional regulatory elements. *Human Molecular Genetics.* 2004;13(17):1933-41.
